# Supplementary material
Source: publisher figshare collection journal article supplement (https://acs.figshare.com/ndownloader/files/4713286)
Supplement: Supplementary file 1 [file 4713286]

data_ipds2067

_audit_creation_method            SHELXL-97
_chemical_name_systematic
;
 ?
;
_chemical_name_common             ?
_chemical_melting_point           ?
_chemical_formula_moiety          'C75 H66 P3 Pt3 S4, C3 H6 O, Cl'
_chemical_formula_sum             'C78 H72 Cl O P3 Pt3 S4'
_chemical_formula_weight          1867.23

loop_
 _atom_type_symbol
 _atom_type_description
 _atom_type_scat_dispersion_real
 _atom_type_scat_dispersion_imag
 _atom_type_scat_source
 'C'  'C'   0.0033   0.0016
 'International Tables Vol C Tables 4.2.6.8 and 6.1.1.4'
 'H'  'H'   0.0000   0.0000
 'International Tables Vol C Tables 4.2.6.8 and 6.1.1.4'
 'Cl'  'Cl'   0.1484   0.1585
 'International Tables Vol C Tables 4.2.6.8 and 6.1.1.4'
 'O'  'O'   0.0106   0.0060
 'International Tables Vol C Tables 4.2.6.8 and 6.1.1.4'
 'P'  'P'   0.1023   0.0942
 'International Tables Vol C Tables 4.2.6.8 and 6.1.1.4'
 'Pt'  'Pt'  -1.7033   8.3905
 'International Tables Vol C Tables 4.2.6.8 and 6.1.1.4'
 'S'  'S'   0.1246   0.1234
 'International Tables Vol C Tables 4.2.6.8 and 6.1.1.4'

_symmetry_cell_setting            monoclinic
_symmetry_space_group_name_H-M    'P21/n'
_symmetry_space_group_name_Hall   '-P 2yn'

loop_
 _symmetry_equiv_pos_as_xyz
 'x, y, z'
 '-x+1/2, y+1/2, -z+1/2'
 '-x, -y, -z'
 'x-1/2, -y-1/2, z-1/2'

_cell_length_a                    28.655(7)
_cell_length_b                    15.065(2)
_cell_length_c                    18.692(5)
_cell_angle_alpha                 90.00
_cell_angle_beta                  88.07(3)
_cell_angle_gamma                 90.00
_cell_volume                      8064(3)
_cell_formula_units_Z             4
_cell_measurement_temperature     223(2)
_cell_measurement_reflns_used     8000
_cell_measurement_theta_min       1.96
_cell_measurement_theta_max       25.00

_exptl_crystal_description        block
_exptl_crystal_colour             yellow
_exptl_crystal_size_max           0.22
_exptl_crystal_size_mid           0.15
_exptl_crystal_size_min           0.15
_exptl_crystal_density_meas       ?
_exptl_crystal_density_diffrn     1.538
_exptl_crystal_density_method     'not measured'
_exptl_crystal_F_000              3632
_exptl_absorpt_coefficient_mu     5.427
_exptl_absorpt_correction_type    'numerical'
_exptl_absorpt_correction_T_min   0.3828
_exptl_absorpt_correction_T_max   0.5006
_exptl_absorpt_process_details   'X-red (Stoe, 2004)'

_exptl_special_details
;
 ?
;

_diffrn_ambient_temperature       223(2)
_diffrn_radiation_wavelength      0.71073
_diffrn_radiation_type            MoK\a
_diffrn_radiation_source          'fine-focus sealed tube'
_diffrn_radiation_monochromator   graphite
_diffrn_measurement_device_type  'STOE IPDS'
_diffrn_measurement_method       'rotation method'
_diffrn_detector_area_resol_mean  ?
_diffrn_standards_number          ?
_diffrn_standards_interval_count  ?
_diffrn_standards_interval_time   ?
_diffrn_standards_decay_%        none
_diffrn_reflns_number             57386
_diffrn_reflns_av_R_equivalents   0.0938
_diffrn_reflns_av_sigmaI/netI     0.0706
_diffrn_reflns_limit_h_min        -34
_diffrn_reflns_limit_h_max        34
_diffrn_reflns_limit_k_min        -17
_diffrn_reflns_limit_k_max        17
_diffrn_reflns_limit_l_min        -22
_diffrn_reflns_limit_l_max        22
_diffrn_reflns_theta_min          1.96
_diffrn_reflns_theta_max          25.00
_reflns_number_total              14180
_reflns_number_gt                 10264
_reflns_threshold_expression      >2sigma(I)

_computing_data_collection        ?
_computing_cell_refinement        ?
_computing_data_reduction         ?
_computing_structure_solution     'SHELXS-97 (Sheldrick, 1990)'
_computing_structure_refinement   'SHELXL-97 (Sheldrick, 1997)'
_computing_molecular_graphics     ?
_computing_publication_material   ?

_refine_special_details
;
 Refinement of F^2^ against ALL reflections.  The weighted R-factor wR and
 goodness of fit S are based on F^2^, conventional R-factors R are based
 on F, with F set to zero for negative F^2^. The threshold expression of
 F^2^ > 2sigma(F^2^) is used only for calculating R-factors(gt) etc. and is
 not relevant to the choice of reflections for refinement.  R-factors based
 on F^2^ are statistically about twice as large as those based on F, and R-
 factors based on ALL data will be even larger.
;

_refine_ls_structure_factor_coef  Fsqd
_refine_ls_matrix_type            full
_refine_ls_weighting_scheme       calc
_refine_ls_weighting_details
 'calc w=1/[\s^2^(Fo^2^)+(0.0758P)^2^+0.0000P] where P=(Fo^2^+2Fc^2^)/3'
_atom_sites_solution_primary      direct
_atom_sites_solution_secondary    difmap
_atom_sites_solution_hydrogens    geom
_refine_ls_hydrogen_treatment     constr
_refine_ls_extinction_method      none
_refine_ls_extinction_coef        ?
_refine_ls_number_reflns          14180
_refine_ls_number_parameters      813
_refine_ls_number_restraints      0
_refine_ls_R_factor_all           0.0679
_refine_ls_R_factor_gt            0.0436
_refine_ls_wR_factor_ref          0.1231
_refine_ls_wR_factor_gt           0.1116
_refine_ls_goodness_of_fit_ref    0.956
_refine_ls_restrained_S_all       0.956
_refine_ls_shift/su_max           0.002
_refine_ls_shift/su_mean          0.000

loop_
 _atom_site_label
 _atom_site_type_symbol
 _atom_site_fract_x
 _atom_site_fract_y
 _atom_site_fract_z
 _atom_site_U_iso_or_equiv
 _atom_site_adp_type
 _atom_site_occupancy
 _atom_site_symmetry_multiplicity
 _atom_site_calc_flag
 _atom_site_refinement_flags
 _atom_site_disorder_assembly
 _atom_site_disorder_group
C1 C 0.0693(3) 0.7956(7) 0.9503(5) 0.043(2) Uani 1 1 d . . .
H1A H 0.0461 0.8434 0.9520 0.052 Uiso 1 1 calc R . .
H1B H 0.0679 0.7662 0.9036 0.052 Uiso 1 1 calc R . .
C2 C 0.0584(3) 0.7301(6) 1.0086(5) 0.040(2) Uani 1 1 d . . .
C3 C 0.0687(4) 0.6404(7) 1.0002(7) 0.056(3) Uani 1 1 d . . .
H3 H 0.0820 0.6204 0.9564 0.068 Uiso 1 1 calc R . .
C4 C 0.0599(5) 0.5793(7) 1.0549(9) 0.072(4) Uani 1 1 d . . .
H4 H 0.0672 0.5189 1.0489 0.086 Uiso 1 1 calc R . .
C5 C 0.0403(5) 0.6104(10) 1.1174(9) 0.081(4) Uani 1 1 d . . .
H5 H 0.0347 0.5702 1.1552 0.097 Uiso 1 1 calc R . .
C6 C 0.0285(4) 0.6980(9) 1.1275(7) 0.065(3) Uani 1 1 d . . .
H6 H 0.0141 0.7166 1.1709 0.078 Uiso 1 1 calc R . .
C7 C 0.0378(3) 0.7583(7) 1.0736(6) 0.051(3) Uani 1 1 d . . .
H7 H 0.0303 0.8185 1.0805 0.062 Uiso 1 1 calc R . .
C8 C 0.0731(3) 1.1594(7) 0.8408(5) 0.047(2) Uani 1 1 d . . .
H8A H 0.0490 1.1404 0.8760 0.056 Uiso 1 1 calc R . .
H8B H 0.0710 1.2241 0.8359 0.056 Uiso 1 1 calc R . .
C9 C 0.0644(3) 1.1167(7) 0.7700(5) 0.043(2) Uani 1 1 d . . .
C10 C 0.0782(4) 1.1577(9) 0.7072(6) 0.062(3) Uani 1 1 d . . .
H10 H 0.0945 1.2118 0.7078 0.075 Uiso 1 1 calc R . .
C11 C 0.0674(4) 1.1172(11) 0.6413(6) 0.074(4) Uani 1 1 d . . .
H11 H 0.0757 1.1449 0.5977 0.089 Uiso 1 1 calc R . .
C12 C 0.0441(4) 1.0356(11) 0.6422(8) 0.075(4) Uani 1 1 d . . .
H12 H 0.0375 1.0078 0.5986 0.090 Uiso 1 1 calc R . .
C13 C 0.0309(4) 0.9964(9) 0.7040(7) 0.063(3) Uani 1 1 d . . .
H13 H 0.0145 0.9423 0.7036 0.076 Uiso 1 1 calc R . .
C14 C 0.0412(4) 1.0350(7) 0.7670(6) 0.051(3) Uani 1 1 d . . .
H14 H 0.0325 1.0061 0.8100 0.061 Uiso 1 1 calc R . .
C15 C 0.0580(3) 1.0980(5) 1.1465(5) 0.034(2) Uani 1 1 d . . .
H15A H 0.0377 1.0795 1.1081 0.041 Uiso 1 1 calc R . .
H15B H 0.0507 1.0608 1.1884 0.041 Uiso 1 1 calc R . .
C16 C 0.0480(3) 1.1925(7) 1.1650(5) 0.043(2) Uani 1 1 d . . .
C17 C 0.0357(3) 1.2523(8) 1.1118(7) 0.059(3) Uani 1 1 d . . .
H17 H 0.0354 1.2336 1.0638 0.071 Uiso 1 1 calc R . .
C18 C 0.0237(4) 1.3397(7) 1.1292(9) 0.068(4) Uani 1 1 d . . .
H18 H 0.0153 1.3789 1.0927 0.081 Uiso 1 1 calc R . .
C19 C 0.0241(4) 1.3697(9) 1.1991(11) 0.085(5) Uani 1 1 d . . .
H19 H 0.0156 1.4284 1.2105 0.102 Uiso 1 1 calc R . .
C20 C 0.0372(5) 1.3110(9) 1.2518(9) 0.074(4) Uani 1 1 d . . .
H20 H 0.0384 1.3307 1.2994 0.088 Uiso 1 1 calc R . .
C21 C 0.0486(4) 1.2228(8) 1.2353(6) 0.055(3) Uani 1 1 d . . .
H21 H 0.0568 1.1837 1.2721 0.066 Uiso 1 1 calc R . .
C22 C 0.2157(3) 0.9511(6) 1.1627(5) 0.036(2) Uani 1 1 d . . .
C23 C 0.2258(3) 0.9675(7) 1.2323(5) 0.047(2) Uani 1 1 d . . .
H23 H 0.2080 0.9401 1.2692 0.056 Uiso 1 1 calc R . .
C24 C 0.2625(4) 1.0246(8) 1.2495(6) 0.058(3) Uani 1 1 d . . .
H24 H 0.2682 1.0375 1.2976 0.069 Uiso 1 1 calc R . .
C25 C 0.2899(4) 1.0615(8) 1.1953(8) 0.065(3) Uani 1 1 d . . .
H25 H 0.3158 1.0965 1.2068 0.079 Uiso 1 1 calc R . .
C26 C 0.2798(4) 1.0474(8) 1.1233(7) 0.062(3) Uani 1 1 d . . .
H26 H 0.2978 1.0741 1.0863 0.074 Uiso 1 1 calc R . .
C27 C 0.2417(4) 0.9919(7) 1.1085(6) 0.051(3) Uani 1 1 d . . .
H27 H 0.2339 0.9825 1.0607 0.061 Uiso 1 1 calc R . .
C28 C 0.1971(3) 0.7754(6) 1.1064(4) 0.0324(19) Uani 1 1 d . . .
C29 C 0.1691(4) 0.7001(7) 1.0947(6) 0.046(2) Uani 1 1 d . . .
H29 H 0.1365 0.7037 1.1016 0.056 Uiso 1 1 calc R . .
C30 C 0.1897(4) 0.6206(7) 1.0730(6) 0.047(2) Uani 1 1 d . . .
H30 H 0.1709 0.5705 1.0657 0.057 Uiso 1 1 calc R . .
C31 C 0.2374(4) 0.6144(7) 1.0621(5) 0.048(3) Uani 1 1 d . . .
H31 H 0.2508 0.5601 1.0476 0.058 Uiso 1 1 calc R . .
C32 C 0.2661(4) 0.6879(7) 1.0723(5) 0.049(3) Uani 1 1 d . . .
H32 H 0.2986 0.6837 1.0641 0.059 Uiso 1 1 calc R . .
C33 C 0.2458(3) 0.7674(7) 1.0950(5) 0.041(2) Uani 1 1 d . . .
H33 H 0.2650 0.8168 1.1029 0.050 Uiso 1 1 calc R . .
C34 C 0.1367(3) 0.8427(6) 1.2171(5) 0.036(2) Uani 1 1 d . . .
C35 C 0.1592(3) 0.7894(7) 1.2672(5) 0.045(2) Uani 1 1 d . . .
H35 H 0.1904 0.7724 1.2585 0.054 Uiso 1 1 calc R . .
C36 C 0.1358(5) 0.7617(8) 1.3293(6) 0.060(3) Uani 1 1 d . . .
H36 H 0.1509 0.7269 1.3633 0.072 Uiso 1 1 calc R . .
C37 C 0.0885(4) 0.7871(8) 1.3403(6) 0.060(3) Uani 1 1 d . . .
H37 H 0.0720 0.7687 1.3820 0.072 Uiso 1 1 calc R . .
C38 C 0.0665(4) 0.8378(8) 1.2913(6) 0.056(3) Uani 1 1 d . . .
H38 H 0.0349 0.8534 1.2990 0.067 Uiso 1 1 calc R . .
C39 C 0.0909(3) 0.8667(6) 1.2291(5) 0.042(2) Uani 1 1 d . . .
H39 H 0.0759 0.9025 1.1957 0.051 Uiso 1 1 calc R . .
C40 C 0.2405(3) 0.9049(7) 0.8358(5) 0.038(2) Uani 1 1 d . . .
C41 C 0.2505(3) 0.8818(7) 0.9046(5) 0.045(2) Uani 1 1 d . . .
H41 H 0.2260 0.8783 0.9393 0.054 Uiso 1 1 calc R . .
C42 C 0.2959(4) 0.8633(8) 0.9245(6) 0.052(3) Uani 1 1 d . . .
H42 H 0.3019 0.8484 0.9722 0.063 Uiso 1 1 calc R . .
C43 C 0.3320(3) 0.8668(7) 0.8743(6) 0.052(3) Uani 1 1 d . . .
H43 H 0.3626 0.8533 0.8875 0.063 Uiso 1 1 calc R . .
C44 C 0.3235(3) 0.8901(8) 0.8049(7) 0.057(3) Uani 1 1 d . . .
H44 H 0.3484 0.8938 0.7709 0.069 Uiso 1 1 calc R . .
C45 C 0.2777(3) 0.9085(8) 0.7847(6) 0.051(3) Uani 1 1 d . . .
H45 H 0.2719 0.9232 0.7369 0.061 Uiso 1 1 calc R . .
C46 C 0.1592(3) 0.8156(6) 0.7806(5) 0.037(2) Uani 1 1 d . . .
C47 C 0.1877(4) 0.7406(8) 0.7721(6) 0.058(3) Uani 1 1 d . . .
H47 H 0.2197 0.7445 0.7808 0.069 Uiso 1 1 calc R . .
C48 C 0.1689(5) 0.6611(8) 0.7511(7) 0.071(4) Uani 1 1 d . . .
H48 H 0.1885 0.6110 0.7475 0.085 Uiso 1 1 calc R . .
C49 C 0.1241(6) 0.6524(9) 0.7357(7) 0.071(4) Uani 1 1 d . . .
H49 H 0.1127 0.5974 0.7202 0.085 Uiso 1 1 calc R . .
C50 C 0.0940(5) 0.7257(10) 0.7429(6) 0.070(4) Uani 1 1 d . . .
H50 H 0.0623 0.7203 0.7321 0.085 Uiso 1 1 calc R . .
C51 C 0.1119(4) 0.8075(8) 0.7665(6) 0.057(3) Uani 1 1 d . . .
H51 H 0.0919 0.8566 0.7727 0.068 Uiso 1 1 calc R . .
C52 C 0.1861(3) 0.9884(6) 0.7265(5) 0.035(2) Uani 1 1 d . . .
C53 C 0.1782(4) 0.9517(7) 0.6615(5) 0.047(2) Uani 1 1 d . . .
H53 H 0.1703 0.8913 0.6580 0.057 Uiso 1 1 calc R . .
C54 C 0.1821(4) 1.0048(9) 0.5993(6) 0.060(3) Uani 1 1 d . . .
H54 H 0.1769 0.9795 0.5543 0.072 Uiso 1 1 calc R . .
C55 C 0.1930(4) 1.0915(9) 0.6039(6) 0.063(3) Uani 1 1 d . . .
H55 H 0.1939 1.1271 0.5626 0.076 Uiso 1 1 calc R . .
C56 C 0.2029(4) 1.1279(7) 0.6690(6) 0.052(3) Uani 1 1 d . . .
H56 H 0.2119 1.1878 0.6714 0.062 Uiso 1 1 calc R . .
C57 C 0.1997(3) 1.0775(7) 0.7318(5) 0.041(2) Uani 1 1 d . . .
H57 H 0.2064 1.1027 0.7763 0.050 Uiso 1 1 calc R . .
C58 C 0.1588(3) 1.3421(6) 0.9618(5) 0.036(2) Uani 1 1 d . . .
C59 C 0.1913(4) 1.4047(7) 0.9376(5) 0.048(2) Uani 1 1 d . . .
H59 H 0.2229 1.3988 0.9486 0.058 Uiso 1 1 calc R . .
C60 C 0.1766(5) 1.4756(8) 0.8972(6) 0.062(3) Uani 1 1 d . . .
H60 H 0.1985 1.5187 0.8820 0.075 Uiso 1 1 calc R . .
C61 C 0.1305(5) 1.4850(7) 0.8786(6) 0.061(3) Uani 1 1 d . . .
H61 H 0.1215 1.5330 0.8501 0.073 Uiso 1 1 calc R . .
C62 C 0.0980(4) 1.4232(7) 0.9023(7) 0.058(3) Uani 1 1 d . . .
H62 H 0.0666 1.4297 0.8906 0.070 Uiso 1 1 calc R . .
C63 C 0.1115(4) 1.3516(7) 0.9435(6) 0.049(3) Uani 1 1 d . . .
H63 H 0.0892 1.3095 0.9592 0.058 Uiso 1 1 calc R . .
C64 C 0.1756(3) 1.2872(6) 1.1066(5) 0.034(2) Uani 1 1 d . . .
C65 C 0.1974(4) 1.2376(7) 1.1562(5) 0.046(2) Uani 1 1 d . . .
H65 H 0.2146 1.1871 1.1419 0.056 Uiso 1 1 calc R . .
C66 C 0.1943(4) 1.2617(9) 1.2296(6) 0.057(3) Uani 1 1 d . . .
H66 H 0.2088 1.2265 1.2639 0.068 Uiso 1 1 calc R . .
C67 C 0.1700(4) 1.3368(9) 1.2505(6) 0.062(3) Uani 1 1 d . . .
H67 H 0.1688 1.3542 1.2989 0.074 Uiso 1 1 calc R . .
C68 C 0.1476(4) 1.3861(9) 1.2005(7) 0.063(3) Uani 1 1 d . . .
H68 H 0.1300 1.4360 1.2151 0.076 Uiso 1 1 calc R . .
C69 C 0.1506(4) 1.3632(7) 1.1283(6) 0.049(2) Uani 1 1 d . . .
H69 H 0.1359 1.3985 1.0942 0.058 Uiso 1 1 calc R . .
C70 C 0.2355(3) 1.2210(7) 0.9917(5) 0.041(2) Uani 1 1 d . . .
C71 C 0.2723(3) 1.2767(7) 1.0133(5) 0.046(2) Uani 1 1 d . . .
H71 H 0.2657 1.3261 1.0427 0.056 Uiso 1 1 calc R . .
C72 C 0.3174(4) 1.2592(9) 0.9917(6) 0.058(3) Uani 1 1 d . . .
H72 H 0.3414 1.2975 1.0054 0.069 Uiso 1 1 calc R . .
C73 C 0.3283(4) 1.1857(9) 0.9498(6) 0.061(3) Uani 1 1 d . . .
H73 H 0.3595 1.1747 0.9348 0.073 Uiso 1 1 calc R . .
C74 C 0.2929(4) 1.1280(9) 0.9299(6) 0.060(3) Uani 1 1 d . . .
H74 H 0.3000 1.0769 0.9027 0.073 Uiso 1 1 calc R . .
C75 C 0.2465(3) 1.1471(6) 0.9508(5) 0.041(2) Uani 1 1 d . . .
H75 H 0.2224 1.1090 0.9368 0.049 Uiso 1 1 calc R . .
C76 C 0.3649(4) 0.5056(8) 1.0979(6) 0.058(3) Uani 1 1 d . . .
C77 C 0.3685(6) 0.5688(9) 1.1601(7) 0.079(4) Uani 1 1 d . . .
H77A H 0.3393 0.5687 1.1880 0.095 Uiso 1 1 calc R . .
H77B H 0.3748 0.6282 1.1423 0.095 Uiso 1 1 calc R . .
H77C H 0.3936 0.5501 1.1901 0.095 Uiso 1 1 calc R . .
C78 C 0.4063(5) 0.4960(11) 1.0514(8) 0.088(5) Uani 1 1 d . . .
H78A H 0.4025 0.4454 1.0201 0.106 Uiso 1 1 calc R . .
H78B H 0.4334 0.4870 1.0803 0.106 Uiso 1 1 calc R . .
H78C H 0.4106 0.5493 1.0228 0.106 Uiso 1 1 calc R . .
O O 0.3293(3) 0.4666(6) 1.0876(5) 0.075(2) Uani 1 1 d . . .
Cl Cl 0.39229(15) 0.7570(3) 1.0291(3) 0.1098(15) Uani 1 1 d . . .
P1 P 0.16814(8) 0.87716(15) 1.13561(12) 0.0313(5) Uani 1 1 d . . .
P2 P 0.18017(8) 0.92383(16) 0.80950(12) 0.0319(5) Uani 1 1 d . . .
P3 P 0.17451(8) 1.24671(16) 1.01585(12) 0.0341(5) Uani 1 1 d . . .
Pt1 Pt 0.121049(11) 0.94344(2) 1.056894(17) 0.03026(10) Uani 1 1 d . . .
Pt2 Pt 0.129737(11) 0.97534(2) 0.895270(17) 0.03026(10) Uani 1 1 d . . .
Pt3 Pt 0.124413(11) 1.13233(2) 0.999120(17) 0.03111(10) Uani 1 1 d . . .
S1 S 0.12862(8) 0.84276(15) 0.96169(12) 0.0338(5) Uani 1 1 d . . .
S2 S 0.13196(8) 1.12943(15) 0.87384(12) 0.0333(5) Uani 1 1 d . . .
S3 S 0.11942(7) 1.08016(15) 1.11741(11) 0.0325(5) Uani 1 1 d . . .
S4 S 0.06886(8) 1.01730(16) 0.97941(12) 0.0381(5) Uani 1 1 d . . .

loop_
 _atom_site_aniso_label
 _atom_site_aniso_U_11
 _atom_site_aniso_U_22
 _atom_site_aniso_U_33
 _atom_site_aniso_U_23
 _atom_site_aniso_U_13
 _atom_site_aniso_U_12
C1 0.047(5) 0.045(6) 0.038(5) -0.002(4) -0.007(4) -0.016(4)
C2 0.039(5) 0.040(6) 0.040(5) 0.001(4) 0.002(4) -0.002(4)
C3 0.059(7) 0.028(6) 0.082(8) -0.013(5) 0.004(6) -0.010(5)
C4 0.090(9) 0.017(6) 0.109(12) 0.003(6) -0.018(8) -0.013(5)
C5 0.085(10) 0.062(10) 0.097(11) 0.041(8) -0.016(8) -0.015(7)
C6 0.056(7) 0.073(9) 0.066(8) 0.017(7) 0.015(6) -0.017(6)
C7 0.045(6) 0.042(6) 0.068(7) 0.005(5) 0.002(5) -0.008(5)
C8 0.045(6) 0.045(6) 0.051(6) 0.001(5) -0.001(4) 0.012(5)
C9 0.034(5) 0.058(7) 0.035(5) 0.005(4) 0.001(4) 0.009(4)
C10 0.042(6) 0.090(10) 0.056(7) 0.017(6) -0.010(5) -0.007(6)
C11 0.060(7) 0.130(13) 0.032(6) 0.005(7) 0.003(5) 0.007(8)
C12 0.047(7) 0.106(12) 0.071(9) -0.032(8) -0.005(6) 0.003(7)
C13 0.052(7) 0.070(9) 0.069(8) -0.008(6) -0.009(6) -0.005(6)
C14 0.046(6) 0.054(7) 0.052(6) 0.010(5) -0.012(5) -0.003(5)
C15 0.047(5) 0.014(4) 0.041(5) 0.001(4) 0.008(4) -0.004(4)
C16 0.031(5) 0.049(6) 0.049(6) 0.008(5) -0.002(4) 0.001(4)
C17 0.036(5) 0.073(9) 0.068(8) 0.014(6) 0.000(5) -0.010(5)
C18 0.050(7) 0.015(5) 0.139(13) 0.014(7) -0.012(7) -0.004(4)
C19 0.044(7) 0.042(8) 0.167(17) -0.026(10) 0.016(8) -0.002(5)
C20 0.077(9) 0.044(8) 0.099(11) -0.022(7) 0.019(7) -0.003(6)
C21 0.057(6) 0.047(7) 0.060(7) 0.003(5) 0.008(5) -0.001(5)
C22 0.032(4) 0.031(5) 0.046(5) -0.006(4) -0.006(4) -0.001(4)
C23 0.046(6) 0.057(7) 0.037(5) -0.016(5) -0.007(4) 0.001(5)
C24 0.059(7) 0.061(8) 0.054(7) -0.017(6) -0.017(5) 0.005(6)
C25 0.068(8) 0.037(7) 0.092(10) -0.012(6) -0.024(7) -0.006(6)
C26 0.055(7) 0.048(7) 0.082(9) 0.004(6) -0.005(6) -0.013(5)
C27 0.052(6) 0.045(6) 0.055(6) 0.004(5) -0.007(5) -0.016(5)
C28 0.039(5) 0.031(5) 0.027(4) 0.008(4) -0.002(3) 0.007(4)
C29 0.046(6) 0.037(6) 0.055(6) 0.003(5) 0.004(4) 0.003(4)
C30 0.060(6) 0.031(6) 0.051(6) -0.005(5) 0.001(5) 0.003(5)
C31 0.060(7) 0.037(6) 0.047(6) -0.002(4) 0.000(5) 0.017(5)
C32 0.052(6) 0.050(7) 0.044(6) -0.003(5) 0.008(4) 0.012(5)
C33 0.047(5) 0.047(6) 0.029(5) 0.000(4) -0.003(4) 0.007(4)
C34 0.043(5) 0.034(5) 0.030(5) 0.006(4) -0.002(4) -0.001(4)
C35 0.039(5) 0.059(7) 0.037(5) 0.004(5) -0.001(4) 0.010(5)
C36 0.089(9) 0.055(7) 0.036(6) 0.011(5) 0.002(5) 0.011(6)
C37 0.079(8) 0.051(7) 0.046(6) 0.010(5) 0.022(6) -0.001(6)
C38 0.064(7) 0.048(7) 0.055(7) 0.003(5) 0.018(5) -0.001(5)
C39 0.048(6) 0.036(6) 0.043(6) 0.004(4) -0.003(4) 0.011(4)
C40 0.025(4) 0.045(6) 0.044(5) 0.003(4) -0.005(4) 0.001(4)
C41 0.040(5) 0.067(7) 0.029(5) 0.005(5) 0.003(4) -0.004(5)
C42 0.049(6) 0.065(8) 0.043(6) 0.009(5) -0.013(4) 0.005(5)
C43 0.034(5) 0.052(7) 0.071(7) 0.020(6) 0.006(5) 0.005(5)
C44 0.034(5) 0.068(8) 0.070(8) 0.010(6) 0.004(5) 0.011(5)
C45 0.044(6) 0.067(8) 0.041(6) 0.012(5) 0.005(4) 0.000(5)
C46 0.046(5) 0.037(6) 0.028(5) -0.005(4) -0.003(4) -0.002(4)
C47 0.064(7) 0.046(7) 0.063(7) 0.006(6) -0.006(5) -0.002(5)
C48 0.113(11) 0.028(6) 0.072(8) 0.005(6) -0.019(8) -0.005(6)
C49 0.113(11) 0.044(8) 0.056(7) -0.007(6) -0.003(7) -0.036(8)
C50 0.076(8) 0.080(10) 0.055(7) -0.018(7) -0.005(6) -0.041(8)
C51 0.050(6) 0.062(8) 0.057(7) -0.020(6) 0.002(5) -0.007(5)
C52 0.028(4) 0.047(6) 0.032(5) -0.001(4) 0.004(3) 0.002(4)
C53 0.065(7) 0.037(6) 0.040(5) -0.002(4) 0.000(5) -0.005(5)
C54 0.081(8) 0.068(9) 0.032(6) 0.003(5) -0.009(5) -0.008(6)
C55 0.068(7) 0.082(10) 0.039(6) 0.026(6) 0.011(5) 0.009(7)
C56 0.057(6) 0.034(6) 0.064(7) 0.021(5) 0.007(5) -0.004(5)
C57 0.042(5) 0.044(6) 0.038(5) 0.000(4) 0.006(4) -0.004(4)
C58 0.057(6) 0.017(4) 0.033(5) -0.004(4) 0.003(4) -0.009(4)
C59 0.061(6) 0.038(6) 0.046(6) 0.006(5) 0.010(5) -0.007(5)
C60 0.085(9) 0.044(7) 0.056(7) 0.007(5) 0.020(6) -0.003(6)
C61 0.102(10) 0.027(6) 0.054(7) 0.011(5) 0.007(6) 0.009(6)
C62 0.075(8) 0.028(6) 0.073(8) 0.012(5) -0.013(6) 0.008(5)
C63 0.061(7) 0.026(5) 0.059(7) 0.001(5) 0.001(5) -0.001(4)
C64 0.041(5) 0.031(5) 0.031(5) -0.002(4) -0.001(4) -0.006(4)
C65 0.063(6) 0.034(6) 0.043(6) -0.001(4) -0.008(5) -0.006(5)
C66 0.056(7) 0.074(8) 0.042(6) 0.003(6) -0.008(5) -0.015(6)
C67 0.057(7) 0.086(9) 0.043(6) -0.018(6) 0.000(5) -0.004(6)
C68 0.056(7) 0.069(8) 0.064(8) -0.026(6) -0.002(6) 0.001(6)
C69 0.049(6) 0.041(6) 0.056(7) 0.001(5) -0.005(5) -0.005(5)
C70 0.044(5) 0.042(6) 0.036(5) 0.006(4) -0.001(4) -0.006(4)
C71 0.040(5) 0.050(6) 0.049(6) 0.002(5) 0.003(4) -0.009(5)
C72 0.048(6) 0.074(9) 0.052(7) 0.006(6) -0.002(5) -0.021(6)
C73 0.041(6) 0.083(9) 0.059(7) 0.006(7) 0.004(5) -0.005(6)
C74 0.056(7) 0.068(8) 0.057(7) -0.013(6) 0.008(5) 0.006(6)
C75 0.036(5) 0.032(5) 0.055(6) -0.005(4) 0.000(4) -0.004(4)
C76 0.061(7) 0.059(8) 0.055(7) 0.016(6) -0.004(5) 0.000(6)
C77 0.110(11) 0.062(9) 0.065(8) 0.006(7) -0.007(7) -0.018(8)
C78 0.076(9) 0.106(13) 0.082(10) 0.015(9) 0.010(7) 0.006(8)
O 0.080(6) 0.080(7) 0.065(6) -0.003(5) -0.015(4) 0.000(5)
Cl 0.082(3) 0.116(4) 0.132(4) 0.043(3) -0.014(2) 0.004(2)
P1 0.0331(11) 0.0295(13) 0.0312(12) 0.0007(9) -0.0012(9) 0.0005(9)
P2 0.0340(11) 0.0337(13) 0.0281(11) 0.0011(9) -0.0007(9) -0.0005(9)
P3 0.0379(12) 0.0306(13) 0.0338(12) 0.0016(10) -0.0009(9) -0.0046(10)
Pt1 0.03634(18) 0.02645(19) 0.02803(17) 0.00297(13) -0.00179(12) -0.00170(14)
Pt2 0.03454(18) 0.0287(2) 0.02748(17) 0.00201(13) -0.00057(12) -0.00243(13)
Pt3 0.03719(18) 0.02737(19) 0.02877(18) 0.00252(13) -0.00100(13) -0.00401(13)
S1 0.0404(12) 0.0305(12) 0.0306(11) 0.0012(9) -0.0009(9) -0.0034(9)
S2 0.0403(12) 0.0289(12) 0.0308(11) 0.0051(9) -0.0015(8) -0.0019(9)
S3 0.0389(11) 0.0305(12) 0.0280(11) 0.0014(9) 0.0005(8) -0.0021(9)
S4 0.0380(12) 0.0388(13) 0.0376(12) 0.0034(10) -0.0022(9) -0.0017(10)

_geom_special_details
;
 All esds (except the esd in the dihedral angle between two l.s. planes)
 are estimated using the full covariance matrix.  The cell esds are taken
 into account individually in the estimation of esds in distances, angles
 and torsion angles; correlations between esds in cell parameters are only
 used when they are defined by crystal symmetry.  An approximate (isotropic)
 treatment of cell esds is used for estimating esds involving l.s. planes.
;

loop_
 _geom_bond_atom_site_label_1
 _geom_bond_atom_site_label_2
 _geom_bond_distance
 _geom_bond_site_symmetry_2
 _geom_bond_publ_flag
C1 C2 1.494(13) . ?
C1 S1 1.862(9) . ?
C1 H1A 0.9800 . ?
C1 H1B 0.9800 . ?
C2 C3 1.391(14) . ?
C2 C7 1.399(14) . ?
C3 C4 1.391(18) . ?
C3 H3 0.9400 . ?
C4 C5 1.36(2) . ?
C4 H4 0.9400 . ?
C5 C6 1.37(2) . ?
C5 H5 0.9400 . ?
C6 C7 1.376(16) . ?
C6 H6 0.9400 . ?
C7 H7 0.9400 . ?
C8 C9 1.500(14) . ?
C8 S2 1.871(10) . ?
C8 H8A 0.9800 . ?
C8 H8B 0.9800 . ?
C9 C10 1.374(15) . ?
C9 C14 1.399(15) . ?
C10 C11 1.417(18) . ?
C10 H10 0.9400 . ?
C11 C12 1.40(2) . ?
C11 H11 0.9400 . ?
C12 C13 1.340(19) . ?
C12 H12 0.9400 . ?
C13 C14 1.356(16) . ?
C13 H13 0.9400 . ?
C14 H14 0.9400 . ?
C15 C16 1.490(14) . ?
C15 S3 1.845(9) . ?
C15 H15A 0.9800 . ?
C15 H15B 0.9800 . ?
C16 C21 1.392(15) . ?
C16 C17 1.397(15) . ?
C17 C18 1.395(17) . ?
C17 H17 0.9400 . ?
C18 C19 1.38(2) . ?
C18 H18 0.9400 . ?
C19 C20 1.39(2) . ?
C19 H19 0.9400 . ?
C20 C21 1.400(17) . ?
C20 H20 0.9400 . ?
C21 H21 0.9400 . ?
C22 C23 1.365(13) . ?
C22 C27 1.382(14) . ?
C22 P1 1.844(9) . ?
C23 C24 1.403(15) . ?
C23 H23 0.9400 . ?
C24 C25 1.378(18) . ?
C24 H24 0.9400 . ?
C25 C26 1.402(18) . ?
C25 H25 0.9400 . ?
C26 C27 1.409(15) . ?
C26 H26 0.9400 . ?
C27 H27 0.9400 . ?
C28 C33 1.409(13) . ?
C28 C29 1.412(14) . ?
C28 P1 1.819(9) . ?
C29 C30 1.390(14) . ?
C29 H29 0.9400 . ?
C30 C31 1.379(15) . ?
C30 H30 0.9400 . ?
C31 C32 1.396(15) . ?
C31 H31 0.9400 . ?
C32 C33 1.391(14) . ?
C32 H32 0.9400 . ?
C33 H33 0.9400 . ?
C34 C39 1.372(13) . ?
C34 C35 1.406(13) . ?
C34 P1 1.819(9) . ?
C35 C36 1.386(14) . ?
C35 H35 0.9400 . ?
C36 C37 1.417(16) . ?
C36 H36 0.9400 . ?
C37 C38 1.364(16) . ?
C37 H37 0.9400 . ?
C38 C39 1.407(14) . ?
C38 H38 0.9400 . ?
C39 H39 0.9400 . ?
C40 C41 1.372(13) . ?
C40 C45 1.409(13) . ?
C40 P2 1.836(9) . ?
C41 C42 1.394(14) . ?
C41 H41 0.9400 . ?
C42 C43 1.373(15) . ?
C42 H42 0.9400 . ?
C43 C44 1.374(16) . ?
C43 H43 0.9400 . ?
C44 C45 1.406(14) . ?
C44 H44 0.9400 . ?
C45 H45 0.9400 . ?
C46 C51 1.397(14) . ?
C46 C47 1.399(15) . ?
C46 P2 1.825(9) . ?
C47 C48 1.375(17) . ?
C47 H47 0.9400 . ?
C48 C49 1.332(19) . ?
C48 H48 0.9400 . ?
C49 C50 1.41(2) . ?
C49 H49 0.9400 . ?
C50 C51 1.411(16) . ?
C50 H50 0.9400 . ?
C51 H51 0.9400 . ?
C52 C53 1.360(13) . ?
C52 C57 1.403(14) . ?
C52 P2 1.834(9) . ?
C53 C54 1.413(15) . ?
C53 H53 0.9400 . ?
C54 C55 1.347(18) . ?
C54 H54 0.9400 . ?
C55 C56 1.372(17) . ?
C55 H55 0.9400 . ?
C56 C57 1.398(14) . ?
C56 H56 0.9400 . ?
C57 H57 0.9400 . ?
C58 C59 1.392(13) . ?
C58 C63 1.416(14) . ?
C58 P3 1.822(9) . ?
C59 C60 1.381(16) . ?
C59 H59 0.9400 . ?
C60 C61 1.384(18) . ?
C60 H60 0.9400 . ?
C61 C62 1.379(17) . ?
C61 H61 0.9400 . ?
C62 C63 1.387(14) . ?
C62 H62 0.9400 . ?
C63 H63 0.9400 . ?
C64 C65 1.359(13) . ?
C64 C69 1.404(14) . ?
C64 P3 1.805(9) . ?
C65 C66 1.418(15) . ?
C65 H65 0.9400 . ?
C66 C67 1.379(17) . ?
C66 H66 0.9400 . ?
C67 C68 1.371(18) . ?
C67 H67 0.9400 . ?
C68 C69 1.392(16) . ?
C68 H68 0.9400 . ?
C69 H69 0.9400 . ?
C70 C75 1.379(14) . ?
C70 C71 1.418(14) . ?
C70 P3 1.832(10) . ?
C71 C72 1.368(15) . ?
C71 H71 0.9400 . ?
C72 C73 1.386(17) . ?
C72 H72 0.9400 . ?
C73 C74 1.398(17) . ?
C73 H73 0.9400 . ?
C74 C75 1.404(14) . ?
C74 H74 0.9400 . ?
C75 H75 0.9400 . ?
C76 O 1.197(14) . ?
C76 C78 1.453(18) . ?
C76 C77 1.510(18) . ?
C77 H77A 0.9700 . ?
C77 H77B 0.9700 . ?
C77 H77C 0.9700 . ?
C78 H78A 0.9700 . ?
C78 H78B 0.9700 . ?
C78 H78C 0.9700 . ?
P1 Pt1 2.262(2) . ?
P2 Pt2 2.259(2) . ?
P3 Pt3 2.271(2) . ?
Pt1 S1 2.343(2) . ?
Pt1 S3 2.350(2) . ?
Pt1 S4 2.391(2) . ?
Pt1 Pt3 3.0440(6) . ?
Pt1 Pt2 3.0608(8) . ?
Pt2 S1 2.351(2) . ?
Pt2 S2 2.356(2) . ?
Pt2 S4 2.394(2) . ?
Pt2 Pt3 3.0601(6) . ?
Pt3 S2 2.345(2) . ?
Pt3 S3 2.346(2) . ?
Pt3 S4 2.390(2) . ?

loop_
 _geom_angle_atom_site_label_1
 _geom_angle_atom_site_label_2
 _geom_angle_atom_site_label_3
 _geom_angle
 _geom_angle_site_symmetry_1
 _geom_angle_site_symmetry_3
 _geom_angle_publ_flag
C2 C1 S1 109.8(7) . . ?
C2 C1 H1A 109.7 . . ?
S1 C1 H1A 109.7 . . ?
C2 C1 H1B 109.7 . . ?
S1 C1 H1B 109.7 . . ?
H1A C1 H1B 108.2 . . ?
C3 C2 C7 118.4(10) . . ?
C3 C2 C1 121.4(9) . . ?
C7 C2 C1 120.2(9) . . ?
C4 C3 C2 121.8(11) . . ?
C4 C3 H3 119.1 . . ?
C2 C3 H3 119.1 . . ?
C5 C4 C3 117.5(11) . . ?
C5 C4 H4 121.2 . . ?
C3 C4 H4 121.2 . . ?
C4 C5 C6 122.7(12) . . ?
C4 C5 H5 118.7 . . ?
C6 C5 H5 118.7 . . ?
C5 C6 C7 119.6(12) . . ?
C5 C6 H6 120.2 . . ?
C7 C6 H6 120.2 . . ?
C6 C7 C2 120.0(11) . . ?
C6 C7 H7 120.0 . . ?
C2 C7 H7 120.0 . . ?
C9 C8 S2 111.5(7) . . ?
C9 C8 H8A 109.3 . . ?
S2 C8 H8A 109.3 . . ?
C9 C8 H8B 109.3 . . ?
S2 C8 H8B 109.3 . . ?
H8A C8 H8B 108.0 . . ?
C10 C9 C14 118.9(10) . . ?
C10 C9 C8 120.6(10) . . ?
C14 C9 C8 120.5(9) . . ?
C9 C10 C11 118.9(12) . . ?
C9 C10 H10 120.5 . . ?
C11 C10 H10 120.5 . . ?
C12 C11 C10 119.1(12) . . ?
C12 C11 H11 120.4 . . ?
C10 C11 H11 120.4 . . ?
C13 C12 C11 121.2(12) . . ?
C13 C12 H12 119.4 . . ?
C11 C12 H12 119.4 . . ?
C12 C13 C14 119.8(13) . . ?
C12 C13 H13 120.1 . . ?
C14 C13 H13 120.1 . . ?
C13 C14 C9 122.0(11) . . ?
C13 C14 H14 119.0 . . ?
C9 C14 H14 119.0 . . ?
C16 C15 S3 112.4(6) . . ?
C16 C15 H15A 109.1 . . ?
S3 C15 H15A 109.1 . . ?
C16 C15 H15B 109.1 . . ?
S3 C15 H15B 109.1 . . ?
H15A C15 H15B 107.9 . . ?
C21 C16 C17 118.2(10) . . ?
C21 C16 C15 121.6(9) . . ?
C17 C16 C15 120.1(10) . . ?
C18 C17 C16 120.5(12) . . ?
C18 C17 H17 119.7 . . ?
C16 C17 H17 119.7 . . ?
C19 C18 C17 121.3(13) . . ?
C19 C18 H18 119.4 . . ?
C17 C18 H18 119.4 . . ?
C18 C19 C20 118.3(12) . . ?
C18 C19 H19 120.8 . . ?
C20 C19 H19 120.8 . . ?
C19 C20 C21 121.1(14) . . ?
C19 C20 H20 119.5 . . ?
C21 C20 H20 119.5 . . ?
C16 C21 C20 120.6(12) . . ?
C16 C21 H21 119.7 . . ?
C20 C21 H21 119.7 . . ?
C23 C22 C27 119.4(9) . . ?
C23 C22 P1 123.6(8) . . ?
C27 C22 P1 116.9(7) . . ?
C22 C23 C24 120.9(10) . . ?
C22 C23 H23 119.5 . . ?
C24 C23 H23 119.5 . . ?
C25 C24 C23 119.5(10) . . ?
C25 C24 H24 120.2 . . ?
C23 C24 H24 120.2 . . ?
C24 C25 C26 120.8(11) . . ?
C24 C25 H25 119.6 . . ?
C26 C25 H25 119.6 . . ?
C25 C26 C27 117.8(11) . . ?
C25 C26 H26 121.1 . . ?
C27 C26 H26 121.1 . . ?
C22 C27 C26 121.4(11) . . ?
C22 C27 H27 119.3 . . ?
C26 C27 H27 119.3 . . ?
C33 C28 C29 118.3(8) . . ?
C33 C28 P1 123.9(7) . . ?
C29 C28 P1 117.8(7) . . ?
C30 C29 C28 119.9(9) . . ?
C30 C29 H29 120.0 . . ?
C28 C29 H29 120.0 . . ?
C31 C30 C29 120.8(10) . . ?
C31 C30 H30 119.6 . . ?
C29 C30 H30 119.6 . . ?
C30 C31 C32 120.7(9) . . ?
C30 C31 H31 119.6 . . ?
C32 C31 H31 119.6 . . ?
C33 C32 C31 118.9(10) . . ?
C33 C32 H32 120.5 . . ?
C31 C32 H32 120.5 . . ?
C32 C33 C28 121.4(10) . . ?
C32 C33 H33 119.3 . . ?
C28 C33 H33 119.3 . . ?
C39 C34 C35 119.9(9) . . ?
C39 C34 P1 120.3(7) . . ?
C35 C34 P1 119.8(7) . . ?
C36 C35 C34 120.7(9) . . ?
C36 C35 H35 119.6 . . ?
C34 C35 H35 119.6 . . ?
C35 C36 C37 118.3(10) . . ?
C35 C36 H36 120.9 . . ?
C37 C36 H36 120.9 . . ?
C38 C37 C36 121.0(10) . . ?
C38 C37 H37 119.5 . . ?
C36 C37 H37 119.5 . . ?
C37 C38 C39 120.0(11) . . ?
C37 C38 H38 120.0 . . ?
C39 C38 H38 120.0 . . ?
C34 C39 C38 120.0(9) . . ?
C34 C39 H39 120.0 . . ?
C38 C39 H39 120.0 . . ?
C41 C40 C45 118.0(8) . . ?
C41 C40 P2 121.3(7) . . ?
C45 C40 P2 120.6(7) . . ?
C40 C41 C42 121.8(9) . . ?
C40 C41 H41 119.1 . . ?
C42 C41 H41 119.1 . . ?
C43 C42 C41 119.9(10) . . ?
C43 C42 H42 120.0 . . ?
C41 C42 H42 120.0 . . ?
C42 C43 C44 120.1(10) . . ?
C42 C43 H43 119.9 . . ?
C44 C43 H43 119.9 . . ?
C43 C44 C45 120.1(10) . . ?
C43 C44 H44 120.0 . . ?
C45 C44 H44 120.0 . . ?
C44 C45 C40 120.1(10) . . ?
C44 C45 H45 120.0 . . ?
C40 C45 H45 120.0 . . ?
C51 C46 C47 118.3(10) . . ?
C51 C46 P2 117.7(8) . . ?
C47 C46 P2 124.0(8) . . ?
C48 C47 C46 120.3(12) . . ?
C48 C47 H47 119.8 . . ?
C46 C47 H47 119.8 . . ?
C49 C48 C47 122.4(13) . . ?
C49 C48 H48 118.8 . . ?
C47 C48 H48 118.8 . . ?
C48 C49 C50 119.7(11) . . ?
C48 C49 H49 120.1 . . ?
C50 C49 H49 120.1 . . ?
C49 C50 C51 119.2(12) . . ?
C49 C50 H50 120.4 . . ?
C51 C50 H50 120.4 . . ?
C46 C51 C50 120.0(11) . . ?
C46 C51 H51 120.0 . . ?
C50 C51 H51 120.0 . . ?
C53 C52 C57 120.4(9) . . ?
C53 C52 P2 121.8(8) . . ?
C57 C52 P2 117.8(7) . . ?
C52 C53 C54 119.6(10) . . ?
C52 C53 H53 120.2 . . ?
C54 C53 H53 120.2 . . ?
C55 C54 C53 120.6(10) . . ?
C55 C54 H54 119.7 . . ?
C53 C54 H54 119.7 . . ?
C54 C55 C56 120.0(10) . . ?
C54 C55 H55 120.0 . . ?
C56 C55 H55 120.0 . . ?
C55 C56 C57 121.2(10) . . ?
C55 C56 H56 119.4 . . ?
C57 C56 H56 119.4 . . ?
C56 C57 C52 118.1(9) . . ?
C56 C57 H57 120.9 . . ?
C52 C57 H57 120.9 . . ?
C59 C58 C63 119.2(9) . . ?
C59 C58 P3 122.6(8) . . ?
C63 C58 P3 118.1(7) . . ?
C60 C59 C58 119.3(11) . . ?
C60 C59 H59 120.4 . . ?
C58 C59 H59 120.4 . . ?
C59 C60 C61 121.8(11) . . ?
C59 C60 H60 119.1 . . ?
C61 C60 H60 119.1 . . ?
C62 C61 C60 119.3(11) . . ?
C62 C61 H61 120.3 . . ?
C60 C61 H61 120.3 . . ?
C61 C62 C63 120.4(12) . . ?
C61 C62 H62 119.8 . . ?
C63 C62 H62 119.8 . . ?
C62 C63 C58 119.9(10) . . ?
C62 C63 H63 120.0 . . ?
C58 C63 H63 120.0 . . ?
C65 C64 C69 119.6(9) . . ?
C65 C64 P3 118.6(7) . . ?
C69 C64 P3 121.5(7) . . ?
C64 C65 C66 120.2(10) . . ?
C64 C65 H65 119.9 . . ?
C66 C65 H65 119.9 . . ?
C67 C66 C65 120.0(11) . . ?
C67 C66 H66 120.0 . . ?
C65 C66 H66 120.0 . . ?
C68 C67 C66 119.6(11) . . ?
C68 C67 H67 120.2 . . ?
C66 C67 H67 120.2 . . ?
C67 C68 C69 120.8(11) . . ?
C67 C68 H68 119.6 . . ?
C69 C68 H68 119.6 . . ?
C68 C69 C64 119.7(10) . . ?
C68 C69 H69 120.1 . . ?
C64 C69 H69 120.1 . . ?
C75 C70 C71 118.6(9) . . ?
C75 C70 P3 120.3(7) . . ?
C71 C70 P3 121.1(8) . . ?
C72 C71 C70 120.4(11) . . ?
C72 C71 H71 119.8 . . ?
C70 C71 H71 119.8 . . ?
C71 C72 C73 121.0(10) . . ?
C71 C72 H72 119.5 . . ?
C73 C72 H72 119.5 . . ?
C72 C73 C74 119.7(10) . . ?
C72 C73 H73 120.1 . . ?
C74 C73 H73 120.1 . . ?
C73 C74 C75 119.2(11) . . ?
C73 C74 H74 120.4 . . ?
C75 C74 H74 120.4 . . ?
C70 C75 C74 121.1(9) . . ?
C70 C75 H75 119.5 . . ?
C74 C75 H75 119.5 . . ?
O C76 C78 122.5(13) . . ?
O C76 C77 120.9(12) . . ?
C78 C76 C77 116.6(13) . . ?
C76 C77 H77A 109.5 . . ?
C76 C77 H77B 109.5 . . ?
H77A C77 H77B 109.5 . . ?
C76 C77 H77C 109.5 . . ?
H77A C77 H77C 109.5 . . ?
H77B C77 H77C 109.5 . . ?
C76 C78 H78A 109.5 . . ?
C76 C78 H78B 109.5 . . ?
H78A C78 H78B 109.5 . . ?
C76 C78 H78C 109.5 . . ?
H78A C78 H78C 109.5 . . ?
H78B C78 H78C 109.5 . . ?
C28 P1 C34 102.7(4) . . ?
C28 P1 C22 104.9(4) . . ?
C34 P1 C22 107.0(4) . . ?
C28 P1 Pt1 116.9(3) . . ?
C34 P1 Pt1 112.4(3) . . ?
C22 P1 Pt1 112.0(3) . . ?
C46 P2 C52 104.2(4) . . ?
C46 P2 C40 105.3(4) . . ?
C52 P2 C40 104.4(4) . . ?
C46 P2 Pt2 107.9(3) . . ?
C52 P2 Pt2 117.2(3) . . ?
C40 P2 Pt2 116.6(3) . . ?
C64 P3 C58 105.5(4) . . ?
C64 P3 C70 104.9(4) . . ?
C58 P3 C70 106.4(4) . . ?
C64 P3 Pt3 114.7(3) . . ?
C58 P3 Pt3 110.6(3) . . ?
C70 P3 Pt3 114.1(3) . . ?
P1 Pt1 S1 99.57(8) . . ?
P1 Pt1 S3 94.38(8) . . ?
S1 Pt1 S3 158.92(8) . . ?
P1 Pt1 S4 176.70(8) . . ?
S1 Pt1 S4 83.39(8) . . ?
S3 Pt1 S4 83.17(8) . . ?
P1 Pt1 Pt3 129.12(6) . . ?
S1 Pt1 Pt3 109.56(6) . . ?
S3 Pt1 Pt3 49.55(5) . . ?
S4 Pt1 Pt3 50.44(6) . . ?
P1 Pt1 Pt2 132.91(6) . . ?
S1 Pt1 Pt2 49.43(6) . . ?
S3 Pt1 Pt2 109.70(5) . . ?
S4 Pt1 Pt2 50.27(6) . . ?
Pt3 Pt1 Pt2 60.167(11) . . ?
P2 Pt2 S1 94.58(8) . . ?
P2 Pt2 S2 101.81(8) . . ?
S1 Pt2 S2 157.89(8) . . ?
P2 Pt2 S4 172.45(8) . . ?
S1 Pt2 S4 83.15(8) . . ?
S2 Pt2 S4 82.33(8) . . ?
P2 Pt2 Pt3 137.10(6) . . ?
S1 Pt2 Pt3 108.79(6) . . ?
S2 Pt2 Pt3 49.23(6) . . ?
S4 Pt2 Pt3 50.18(6) . . ?
P2 Pt2 Pt1 132.47(6) . . ?
S1 Pt2 Pt1 49.18(5) . . ?
S2 Pt2 Pt1 108.87(5) . . ?
S4 Pt2 Pt1 50.20(6) . . ?
Pt3 Pt2 Pt1 59.643(15) . . ?
P3 Pt3 S2 96.56(8) . . ?
P3 Pt3 S3 98.23(8) . . ?
S2 Pt3 S3 159.30(8) . . ?
P3 Pt3 S4 177.08(9) . . ?
S2 Pt3 S4 82.65(8) . . ?
S3 Pt3 S4 83.26(8) . . ?
P3 Pt3 Pt1 132.30(6) . . ?
S2 Pt3 Pt1 109.73(6) . . ?
S3 Pt3 Pt1 49.64(6) . . ?
S4 Pt3 Pt1 50.48(6) . . ?
P3 Pt3 Pt2 130.96(6) . . ?
S2 Pt3 Pt2 49.55(6) . . ?
S3 Pt3 Pt2 109.82(6) . . ?
S4 Pt3 Pt2 50.29(6) . . ?
Pt1 Pt3 Pt2 60.190(17) . . ?
C1 S1 Pt1 105.8(3) . . ?
C1 S1 Pt2 105.1(3) . . ?
Pt1 S1 Pt2 81.39(7) . . ?
C8 S2 Pt3 105.7(3) . . ?
C8 S2 Pt2 105.9(4) . . ?
Pt3 S2 Pt2 81.23(7) . . ?
C15 S3 Pt3 104.9(3) . . ?
C15 S3 Pt1 105.8(3) . . ?
Pt3 S3 Pt1 80.81(7) . . ?
Pt3 S4 Pt1 79.08(7) . . ?
Pt3 S4 Pt2 79.53(7) . . ?
Pt1 S4 Pt2 79.53(7) . . ?

_diffrn_measured_fraction_theta_max    0.999
_diffrn_reflns_theta_full              25.00
_diffrn_measured_fraction_theta_full   0.999
_refine_diff_density_max    2.469
_refine_diff_density_min   -1.152
_refine_diff_density_rms    0.189 
